# Supplementary material
Source: PubMed Central journal article supplement (PMC3121833)
Supplement: 1017669108_pnas.1017669108_SI.pdf [file 1017669108_pnas.1017669108_SI.pdf]

# Supporting Information

Zhu et al. 10.1073/pnas.1017669108

## SI Materials and Methods

**Construction of the Structural Model of the TRPP2/PKD1 Coiled-Coil Complex.** To generate a structural model of TRPP2/PKD1 coiled-coil complex, we employed a two-step docking strategy. First, a rigid-body docking procedure was used to dock the PKD1 coiled-coil as a rigid body onto the TRPP2 coiled-coil trimer. During the docking calculation, the position and orientation of the PKD1 helix relative to the TRPP2 trimer were optimized extensively. Then, molecular dynamics (MD) simulation was used to refine the atomic details of the TRPP2/PKD1 interface.

**Stage 1: Docking PKD1 C-terminal Helix onto TRPP2 C-terminal Domain Trimer.** The docking procedure used in this stage was adapted from an iterative modular optimization (IMO) (1) procedure developed previously for refining secondary structure elements (SSEs) of homology models. The basic idea of IMO is to move SSEs as rigid bodies in torsional space (1, 2) and evaluate the sampled conformations using a statistical potential (3) in an iterative manner to search for low-energy conformations. IMO has been found to be very effective in packing helices onto protein structures in homology modeling, suggesting that it can be used to dock the PKD1 helix onto the TRPP2 coiled-coil trimer.

Fig. S10A illustrates a docking procedure in which the PKD1 helix was anchored to the symmetric axis of the TRPP2 trimer using a 30-glycine loop at both ends, each anchor being 10 Å away from the nearest TRPP2 atom. This procedure only allowed one predetermined packing mode, either parallel or antiparallel, defined by the N-to-C direction of the PKD1 helix relative to that of the TRPP2 trimer. In the docking, the trimer structure was treated as the protein body and the PKD1 helix as the region to be refined, just as in the standard IMO procedure. The two artificial loops served as driver regions and spatial constraint in sampling and were not involved in energy calculation. Fig. S10B illustrates another docking procedure used for comparison, in which the PKD1 helix was directly connected to one of the TRPP2 domains using a single, 100-glycine loop. In principle, this procedure allowed both parallel and antiparallel packing modes. In both docking procedures, the initial structure of the PKD1 helix was generated using standard geometry by setting the backbone dihedral angles  $\phi$  and  $\psi$  to  $-60^\circ$  and  $-45^\circ$ .

Two issues that might affect docking were investigated. First, the distribution of the docked PKD1 helix in all three grooves of the TRPP2 trimer was similar, confirming that the conformational sampling was unbiased. Second, the docked PKD1 helix was relaxed using an IMO procedure where a small perturbation of  $5^\circ$  was applied to the backbone of two connecting loops. The resulting PKD1 conformation and energy calculated using a statistical potential based on the distance-scaled, finite, ideal-gas reference state (DFIRE) were almost unchanged, confirming that the rigid-body docking had indeed converged.

The model complexes obtained from docking were energy minimized using the program *minimize.x* in the TINKER package (4) with nonhydrogen backbone atoms fixed using a force constant of 100 kcal/mol per Å<sup>2</sup>. After minimization, the lowest-energy conformation was selected for the subsequent MD simulation.

**Stage 2: Refining Model Complex Using MD Simulations.** Two MD simulation protocols were used: one involved 10 standard MD simulations and the other corresponded to a replica-exchange MD (REMD) simulation that consisted of 20 replicas. In the standard MD protocol, the model complex was first relaxed with

a 200-step steepest descent energy minimization and then adapted to implicit solvent with a 100-ps restrained dynamics during which the positions of nonhydrogen atoms were fixed. In the data collection stage, ten 5-ns simulations were performed without restraints. Each of 10 simulations used a different random number to assign initial atomic velocities. In the REMD protocol, 20 simulations (replicas) were performed simultaneously at temperatures ranging from 270 to 370 K. At an interval of 5 ps, the exchange of conformations between neighboring replicas was attempted according to a Metropolis criterion except during the restrained dynamics. The data collection stage was a 5-ns simulation with an exchange rate of 0.33. Only conformations from the ten lowest-temperature replicas were used in trajectory analysis. In this study, REMD was used as an alternative MD technique to confirm the conclusions drawn from the results of standard MD simulations.

In both MD protocols, the GROMOS96 43a1 force field (5) was used in conjunction with the modified analytic generalized Born implicit solvation model (6) in simulation. The protonation state of the ionizable amino acids was set appropriate for pH 7.0 assuming standard pK<sub>a</sub>s. Stochastic dynamics (SD) (7) was used with a friction coefficient of water ( $\gamma_w$ ) that equaled 91 ps<sup>-1</sup> and was weighted by atomic accessibility. A time step of 2 fs was used in all simulations with the covalent bond lengths constrained by SHAKE algorithm (8). The temperature was kept at 300 K by weak coupling algorithm (9), with the relaxation time being 0.1 ps. The nonbonded interactions were calculated without cut-offs. Coordinates and energies were recorded every 1 ps.

Ten MD simulations were performed on the TRPP2 coiled-coil domain trimer using the standard MD simulation protocol described above. In each simulation, the random number used to generate initial atomic velocities was the same as in the corresponding complex simulation, except for the presence of the PKD1 coiled-coil helix in the starting structure. This approach allows us to quantitatively examine the effect of PKD1 binding on the dynamics of the TRPP2 coiled-coil trimer in solution.

**Analysis of MD Simulation Results.** A consensus-based contact analysis was used to extract the residue-residue contacts across the binding interface. A contact was defined by a cut-off distance of 7 Å between two C<sub>α</sub> atoms or 6 Å between two C<sub>β</sub> atoms. Given the 1,000 conformations sampled in the last 1-ns simulation, a list of interfacial contacts was derived from each conformation; only those contacts that were present within >60% of the simulation time for standard MD (or 30% for REMD) were retained. These contacts were ranked according to the frequency of occurrence (FOC), defined by the number of MD simulations in which they emerged as significant contributors to the complex conformation.

A structure clustering algorithm was adapted to identify a small set of conformations that could best represent the conformational space sampled. The basic idea was to iteratively group the conformations into clusters and then select energetically the most favorable conformation as the cluster center. This algorithm has been successfully applied to a number of studies. In this work the conformations sampled in the last 1-ns simulation were collected from all 10 MD runs for clustering and the clustering cut-off was set to 3.5 Å. The representative conformations of top 20 clusters were further analyzed in detail.

**Constructs and Cloning.** All mutations were introduced into the WT constructs by PCR and the mutation sites were confirmed by sequencing. Experiments involving protein fragments were done

using the human TRPP2 [National Center for Biotechnology Information (NCBI) accession no. U50928] and PKD1 (NCBI accession no. L39891), whereas experiments involving full-length proteins were done using the human TRPP2 and mouse PKD1 (mPKD1, NCBI accession no. NM\_013630).

For constructs used in pull-down and disulfide bond analysis experiments, PCR-generated WT or mutant TRPP2 C-terminal fragments were cloned into pET28a(+) (Novagen) vector. A 22-aa peptide (MGSSHHHHHSSGLVPRGSHM) containing a His<sub>6</sub> tag was introduced at the N terminus of the TRPP2 fragments. The coiled-coil domain fragments of WT or mutant human PKD1 were cloned into a modified pCDFduet-1 (Novagen) vector containing a maltose binding protein (MBP) cDNA; thus the PKD1 fragments all contained an MBP tag on the N terminus.

Full-length human TRPP2 and mouse PKD1 were used in coimmunoprecipitation (coIP) and immunofluorescence experiments. An HA tag was added to the N terminus of TRPP2, and the construct was cloned into the pCDNA3.1(-) vector (Invitrogen). The signal peptide (M1–A23) of mouse PKD1 was replaced by a Ig k-chain leader sequence (METDTLLLWVLLLVPGSTGD) and a FLAG tag was added immediately after this sequence. This construct was cloned into the pIRESpuro2 vector (Clontech).

For constructs used in the total internal reflection fluorescence (TIRF) imaging experiments, human TRPP2 and mouse PKD1 cDNA were cloned into a modified pGEMHE vector containing the EGFP or mCherry cDNA, respectively, in the multiple cloning sites, with a flexible linker (SRGTSGGSGGSRGSGGSGG) in between. The final constructs were TRPP2–SRGTSGGSGG–SRGSGGSGG–EGFP and mPKD1–SRGTSGGSGGSRGSGG–SGG–mCherry.

**Expression of Protein Fragments, Pull-Down, and Chromatography.** His<sub>6</sub>-tagged TRPP2 fragments and MBP-tagged PKD1 fragments were coexpressed in the *Escherichia coli* strain Rosetta 2(DE3) (Novagen), and purified with Ni-nitrilotriacetate (NTA) His•Bind superflow resins (Novagen) by following the manufacturer's protocol. The bacteria lysis solution contained 50 mM Tris-HCl, 250 mM NaCl, 7 mM β-mercaptoethanol (β-ME) and 2.5% glycerol (pH 7.8). The protein complex was eluted from the Ni-NTA His•Bind beads with 250 mM imidazole in the lysis solution and analyzed by SDS-PAGE. More details were described previously in ref. 10.

To determine the oligomerization state of the PKD1 coiled-coil, MBP-tagged PKD1<sub>S4212–R4248</sub> fragments were expressed in *E. coli* as described above. The cell lysates were incubated with the MBP-binding amylose resin (New England Biolabs) at 4°C for 2 h. The beads were centrifuged at 2,000 rpm for 1 min, collected and washed with 20 vol of the above lysis solution. Bound protein was then eluted with the same lysis solution containing 20 mM maltose. This protein was further purified with a Superose 12-gel filtration column (GE Healthcare).

**Light-Scattering Measurements.** Gel filtration-purified MBP–PKD1<sub>S4212–R4248</sub> fragments from above were run through another gel filtration column protein KW-802.5 (Shodex) with a solution containing 200 mM NaCl and 100 mM Tris-HCl (pH 7.5). Eluates were examined by static light-scattering (Wyatt Technology).

**Disulfide Bond Analysis.** WT and mutant TRPP2/PKD1 coiled-coil complexes were expressed and purified with Ni-NTA beads (see above). Proteins eluted from the beads were further incubated with the MBP-binding amylose resin (New England Biolabs) and then collected as above. Beads were resuspended and washed with 20 vol of the above lysis solution without β-ME. The protein complexes were then eluted from the beads with the same solu-

tion contains 20 mM maltose. Protein samples were mixed with either unreduced sample buffer (3X SDS blue loading buffer, New England Biolabs), or reduced sample buffer (3X SDS sample buffer with 100 mM DTT and 5% β-ME added). Samples were boiled for 3 min and analyzed by SDS-PAGE with NuPAGE novex 4–12% Bis-Tris gels (Invitrogen).

**Coimmunoprecipitation.** HEK 293T cell lines that stably express either FLAG-tagged mouse PKD1 or HA-tagged TRPP2 were used in the coIP experiments. The transiently expressed cDNA was transfected into the stable cells with Lipofectamine 2000 (Invitrogen). Monoclonal antiFLAG antibody (M2) coated beads (Sigma) were used to IP the proteins from cell lysates prepared 36–40 h after transfection. The bound proteins were eluted with 1X SDS sample loading buffer. Details of stable cell line generation, cell culture, transfection, cell lysis, and IP were described previously (10). Samples were analyzed by SDS-PAGE and Western blotting.

**SDS-PAGE and Western Blotting.** SDS-PAGE was performed in Tris-glycine buffer under reducing condition with 10 or 15% acrylamide gel for pull-down experiments; or in MOPS buffer under nonreducing condition with NuPAGE novex 4–12% Bis-Tris gels (Invitrogen) for disulfide bond analysis experiments. Precision Plus Protein All Blue Standards (BioRad) was used as molecular mass markers. Gel pictures were taken with a Kodak gel imaging system.

Western blotting was done with the One-Step Western Kit (GenScript). The primary antibodies used were mouse monoclonal antiHA antibody (Covance) and mouse monoclonal anti-FLAG antibody (Sigma). The secondary antibody used was Alexa Fluor 680 goat anti-mouse IgG (Invitrogen). Membranes were scanned with the Odyssey Infrared Imaging System (Li-COR).

For both pull-down and coIP experiments, the intensity of the protein bands was analyzed with the software ImageJ, and the effects of the mutations were quantified by calculating the ratio of the band intensity of the following two protein pairs: MBP–PKD1 fragment:His<sub>6</sub>–TRPP2 fragment (for SDS-PAGE gels in pull-down experiments) and full-length HA–TRPP2:full-length FLAG–PKD1 (for Western blotting in coIP experiments).

**Surface Channel Analysis with Immunofluorescence.** HEK 293T cells were transfected with appropriate DNA combinations with Lipofectamine 2000 (Invitrogen) and incubated for 36 h. Cells were washed twice with PBS solution and then fixed with 4% paraformaldehyde in PBS for 15 min. After a 5-min wash with PBS three times, cells were either permeabilized with 0.25% Triton X-100 for 20 min followed by three 5-min washes or processed similarly but without Triton X-100. Subsequently, cells were blocked with 1% goat serum in PBS for 1 h and incubated with the monoclonal antiFLAG (Sigma) antibody in the same blocking solution at 4°C overnight. After three 10-min washes with PBS, the cells were incubated with fluorescein (FITC)-conjugated goat anti-mouse IgG and 1% goat serum in PBS for 1 h at room temperature. After another three 10-min washes with PBS, cells were mounted on slides and imaged with an Olympus confocal microscope.

**Surface Channel Analysis with TIRF Microscopy.** The detailed methods were described previously (10, 11). In brief, 24–48 h after injection of in vitro transcribed cRNAs, *Xenopus* oocytes were treated to enable a close contact with the coverslip. A 488-nm Argon laser was used to excite EGFP and a 593-nm DPSS laser was used to excite mCherry. Spots that exhibited both EGFP and mCherry fluorescence were considered as TRPP2/PKD1 complexes.









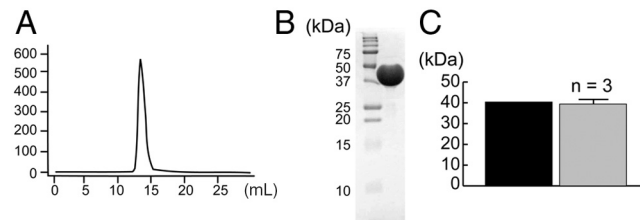

**Fig. 56.** The PKD1 coiled-coil domain is a monomer. (A) Gel filtration profile of an MBP-tagged PKD1 coiled-coil domain fragment (MBP-PKD1\_S4212–R4248), showing a single sharp peak. (B) In SDS-PAGE, MBP-PKD1\_S4212–R4248 migrates as a single band with a molecular mass equal to a monomer. (C) The calculated molecular mass of monomeric MBP-PKD1\_S4212–R4248 is 40.4 kDa (black bar). The experimentally measured (by static light-scattering) molecular mass of MBP-PKD1\_S4212–R4248 is  $39.4 \pm 0.8$  (mean  $\pm$  SD). (gray bar), indicating that MBP-PKD1\_S4212–R4248 exists as a monomer in solution.

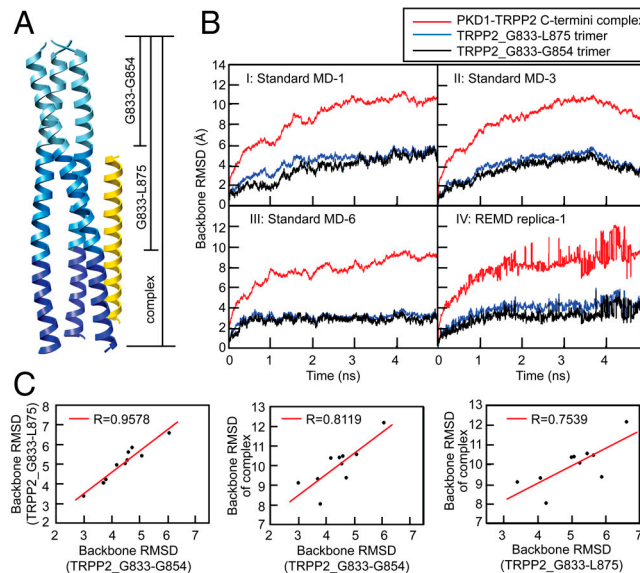

**Fig. 57.** Root mean square deviation analysis of the backbone of the TRPP2/PKD1 coiled-coil complex. (A) Based on the TRPP2 sequence, three sets of atoms were specified in the rmsd calculation: the first corresponding to the N-terminal 22 aa from G833 to G854, a secondary structure breaker; the second from G833 to L875, preceding a highly charged KRRE region; and the last comprising the entire TRPP2/PKD1 complex. (B) Plots of the rmsd as a function of simulation time for three independent MD runs (1, 3, and 6), as examples, and for the lowest-temperature replica in the REMD simulation. As can be seen, the conformational space was being explored along different paths in the three exemplary MD runs. However, the three rmsd measures in each MD run, although differ in numbers, appear to be correlated to one another. (C) To examine this possibility, we calculated the average rmsd of the last 1-ns simulation for all 10 MD runs and then calculated the correlation between any two measures. The correlation coefficient ranged from 0.754 to 0.958, suggesting that the conformational change of the small TRPP2 N-terminal segments ( $3 \times 22$  residues) orchestrates the conformational change of the entire complex [ $3 \times 65$  (TRPP2) + 37 (PKD1) residues]. The 10 MD simulations of the TRPP2 coiled-coil trimer yielded similar results (Fig. S8).

Frequent exchange between replicas in REMD simulation was also plotted (B, iv). The three rmsd measures behaved similarly as they did in the standard MD simulations, leading to essentially the same conclusion as above.







**Table S1. Selected residue-residue contacts extracted from the last 1 ns of MD simulations**

| C $\alpha$ -based contacts              |       |                                       |                              |                  | C $\beta$ -based contacts |       |                                     |                              |                  |
|-----------------------------------------|-------|---------------------------------------|------------------------------|------------------|---------------------------|-------|-------------------------------------|------------------------------|------------------|
| PKD1                                    | TRPP2 | $\langle r_{C\alpha-C\alpha} \rangle$ | $\langle \text{FOC} \rangle$ | $N_{\text{sim}}$ | PKD1                      | TRPP2 | $\langle r_{C\beta-C\beta} \rangle$ | $\langle \text{FOC} \rangle$ | $N_{\text{sim}}$ |
| Standard MD simulation protocol         |       |                                       |                              |                  |                           |       |                                     |                              |                  |
| Q4240                                   | V880  | 6.0                                   | 0.95                         | 7                | Q4240                     | V880  | 5                                   | 0.94                         | 8                |
| Y4236                                   | R877  | 5.9                                   | 0.89                         | 7                | Y4236                     | K876  | 4.7                                 | 0.94                         | 8                |
| N4229                                   | I869  | 6.4                                   | 0.83                         | 7                | F4225                     | V865  | 5.3                                 | 0.83                         | 7                |
| L4242                                   | L885  | 6.1                                   | 0.88                         | 6                | E4239                     | R877  | 5.3                                 | 0.86                         | 6                |
| Q4246                                   | R893  | 5.4                                   | 0.86                         | 5                | L4238                     | L881  | 4.1                                 | 0.99                         | 5                |
| L4238                                   | L881  | 6.3                                   | 0.92                         | 5                | L4228                     | L869  | 5.0                                 | 0.87                         | 5                |
| Q4240                                   | R877  | 5.6                                   | 0.98                         | 5                | N4229                     | L869  | 5.3                                 | 0.80                         | 4                |
| E4239                                   | R877  | 6.4                                   | 0.78                         | 5                | V4217                     | I864  | 5.2                                 | 0.96                         | 4                |
| Y4236                                   | K876  | 6.4                                   | 0.88                         | 5                | R4213                     | D861  | 5.2                                 | 0.73                         | 4                |
| V4217                                   | I864  | 6.3                                   | 0.89                         | 4                | V4217                     | I860  | 5.3                                 | 0.89                         | 4                |
| R4213                                   | S855  | 6.2                                   | 0.83                         | 4                | Q4246                     | L894  | 5.1                                 | 0.74                         | 3                |
| Q4246                                   | L894  | 5.4                                   | 0.99                         | 3                | Q4246                     | V888  | 4.8                                 | 0.96                         | 3                |
| Q4246                                   | V888  | 5.6                                   | 0.91                         | 3                | L4245                     | V888  | 5.0                                 | 0.88                         | 3                |
| L4245                                   | V888  | 6.2                                   | 0.77                         | 3                | Y4236                     | V880  | 5.0                                 | 0.89                         | 3                |
| L4221                                   | V863  | 6.2                                   | 0.94                         | 3                | F4225                     | I869  | 5.3                                 | 0.80                         | 3                |
| R4213                                   | S858  | 5.9                                   | 0.84                         | 3                | Q4246                     | R893  | 4.6                                 | 0.84                         | 2                |
| Q4246                                   | E892  | 6.2                                   | 0.89                         | 2                | H4243                     | R883  | 5.4                                 | 0.80                         | 2                |
| Y4236                                   | V880  | 6.3                                   | 0.92                         | 2                | D4234                     | R878  | 5.3                                 | 0.84                         | 2                |
| D4234                                   | R878  | 6.5                                   | 0.71                         | 2                | R4227                     | E871  | 4.9                                 | 0.90                         | 2                |
| L4228                                   | I869  | 6.4                                   | 0.96                         | 2                | Q4224                     | E871  | 5.3                                 | 0.80                         | 2                |
| F4225                                   | I869  | 6.5                                   | 0.81                         | 2                | Q4224                     | K866  | 5.5                                 | 0.81                         | 2                |
| Q4224                                   | E868  | 6.5                                   | 0.81                         | 2                | L4221                     | V863  | 5.4                                 | 0.75                         | 2                |
| F4225                                   | V865  | 6.6                                   | 0.69                         | 2                | R4213                     | S858  | 5.4                                 | 0.78                         | 2                |
| R4213                                   | D861  | 5.9                                   | 0.81                         | 2                | L4214                     | V857  | 5.3                                 | 0.70                         | 2                |
| L4214                                   | V857  | 6.3                                   | 0.79                         | 2                | L4245                     | L885  | 4.5                                 | 0.99                         | 1                |
| L4245                                   | L894  | 6.0                                   | 0.91                         | 1                | L4242                     | L885  | 4.2                                 | 0.97                         | 1                |
| L4245                                   | L885  | 5.8                                   | 0.99                         | 1                | Q4246                     | L884  | 5.3                                 | 0.61                         | 1                |
| Q4246                                   | L884  | 6.1                                   | 0.69                         | 1                |                           |       |                                     |                              |                  |
| Replica-exchange MD simulation protocol |       |                                       |                              |                  |                           |       |                                     |                              |                  |
| Q4246                                   | L894  | 5.5                                   | 0.45                         | 9                | L4238                     | L881  | 4.2                                 | 0.90                         | 9                |
| Q4246                                   | R893  | 5.2                                   | 0.46                         | 9                | H4243                     | V880  | 4.8                                 | 0.62                         | 9                |
| L4242                                   | L885  | 6.2                                   | 0.68                         | 9                | Q4240                     | V880  | 5.1                                 | 0.71                         | 9                |
| L4238                                   | L881  | 6.3                                   | 0.80                         | 9                | D4234                     | R878  | 5.2                                 | 0.58                         | 9                |
| N4229                                   | I869  | 6.3                                   | 0.56                         | 9                | Y4236                     | K876  | 4.4                                 | 0.70                         | 9                |
| Q4240                                   | V880  | 6.0                                   | 0.73                         | 8                | Y4236                     | R877  | 4.8                                 | 0.60                         | 8                |
| D4234                                   | R878  | 6.5                                   | 0.47                         | 8                | N4229                     | I869  | 5.3                                 | 0.51                         | 8                |
| Y4236                                   | R877  | 5.6                                   | 0.71                         | 8                | L4228                     | I869  | 5.3                                 | 0.43                         | 8                |
| Y4236                                   | K876  | 6.4                                   | 0.59                         | 8                | E4239                     | R877  | 5.4                                 | 0.49                         | 5                |
| E4239                                   | R877  | 6.6                                   | 0.39                         | 3                | Q4241                     | L885  | 5.6                                 | 0.37                         | 4                |
| Q4240                                   | R877  | 6.2                                   | 0.38                         | 2                | L4242                     | L885  | 5.4                                 | 0.38                         | 3                |
| L4228                                   | L875  | 6.3                                   | 0.38                         | 1                | R4213                     | H851  | 5.2                                 | 0.36                         | 3                |
|                                         |       |                                       |                              |                  | Q4246                     | R893  | 4.8                                 | 0.40                         | 2                |
|                                         |       |                                       |                              |                  | L4245                     | V888  | 5.1                                 | 0.38                         | 2                |
|                                         |       |                                       |                              |                  | H4243                     | R883  | 5.3                                 | 0.38                         | 2                |
|                                         |       |                                       |                              |                  | Y4236                     | V880  | 5.0                                 | 0.42                         | 2                |
|                                         |       |                                       |                              |                  | F4225                     | V865  | 5.3                                 | 0.40                         | 2                |
|                                         |       |                                       |                              |                  | L4242                     | L884  | 5.7                                 | 0.37                         | 1                |
|                                         |       |                                       |                              |                  | R4213                     | S855  | 4.7                                 | 0.37                         | 1                |

One thousand conformations sampled in the last 1-ns simulation of 10 standard MD simulations and of 10 lowest-temperature replicas from the REMD simulation were subjected to the contact analysis. A distance cut-off of 7.0 and 6.0 Å was used for C $\alpha$ -C $\alpha$  and C $\beta$ -C $\beta$  contact analysis, respectively. For a residue-residue contact, if the frequency of occurrence (FOC) was higher than 0.6 in the case of standard MD simulation or 0.35 in the case of REMD simulation, it was considered a stable contact. The columns in each subtable list the contact residue in PKD1, the contact residue in TRPP2, the average contact distance, the average FOC, and the total number of simulations ( $N_{\text{sim}}$ ) in which this contact was observed.

### Other Supporting Information Files

[Dataset S1 \(TXT\)](#)

[Dataset S2 \(TXT\)](#)
